# Supplementary material
Source: PubMed Central journal article supplement (PMC5178883)
Supplement: NIHMS69432-supplement-Supplementary_Methods.pdf [file NIHMS69432-supplement-Supplementary_Methods.pdf]

## Supplementary Methods

### Intracellular Staining

Cells were activated with Phorbol 12-myristate 13-acetate (PMA) (50ng/mL, SIGMA), Ionomycin (1 $\mu$ g/mL, SIGMA), GolgiStop (1X, BD) and Brefeldin A (1X, BD) for 5hrs at 37°C 5% CO<sub>2</sub>. Cells were stained with Live/Dead dye (Invitrogen), anti-CD20-AlexaFluor780 and anti-CD3-PerCP-Cy5.5 (all eBioscience) for 30min at 4°C. Samples were then fixed and permeabilized with FoxP<sub>3</sub> Fix and Perm Kit (BD) and stained with anti-IL10-PE (BD) and TNF- $\alpha$  (eBioscience) for 30min at 4°C. Cells were acquired on LSRFortessa (BD).

### ELISA

ELISA (eBioscience: IL-10) (R&D: TNF- $\alpha$ ) was performed according to manufacturer's instructions. Briefly, 96-well plates (Nunc™, Thermo Scientific) were incubated overnight with capture antibody at 4°C. The next day, plates were blocked for 1hr with 1%BSA, and standards and supernatant were added for 2hrs at room temperature. Detection antibody was added for 2hrs at room temperature and streptavidin-HRP was added for 20min at room temperature. Finally, plates were incubated with TMB (eBioscience) for 10min at room temperature and reaction was stopped using 0.5 M 2N H<sub>2</sub>SO<sub>4</sub>. Optical density at 405nm was measured using Sunrise ELISA Reader (TECAN, UK). The concentration of each cytokine was calculated from standard curves using Magellan data analysis Software. For IL-10: the sensitivity of the kit was 2 pg/mL and the standard curve range was from 2 to 300 pg/mL. For TNF- $\alpha$ : the sensitivity of the kit was 15.6 pg/mL and the standard curve range was from 15.6 to 1000 pg/mL.

### **B-cell subsets from peripheral blood cones**

RosetteSep™ Human B cell enrichment cocktail (STEM CELL, UK) was used to obtain purified CD20<sup>+</sup>B-cells from leukocytes retained filtering cones from healthy volunteers blood donations (NHSBT Tooting blood bank, UK). B-cell subsets were sorted with ARIA II (BD). Memory B-cells were CD20<sup>+</sup>CD27<sup>+</sup> (purity >95%), naïve B-cells CD20<sup>+</sup>CD27<sup>-</sup>CD24<sup>+</sup>CD38<sup>+</sup> (purity >95%) and transitional B-cells CD20<sup>+</sup>CD27<sup>-</sup>CD24<sup>hi</sup>CD38<sup>hi</sup> (purity >95%). For IL-10 measurements in different B-cell subsets: 0.5x10<sup>6</sup> B-cell subsets were cultured in complete media supplemented with IL-2 (100ng/ml, R&D) with or without 1.0x10<sup>4</sup> plate bound CD40L-transfected and non-transfected mouse L fibroblast cells (X-ray irradiated for 30min 9,045 cGy), and CpG – a TLR9 agonist - (1μM; ODN 2006, InvivoGen) for 72hrs. After 3 days of activation, cells were stained with anti-CD20-AlexaFluor780 (eBioscience) and Live/Dead fixable yellow dead cell staining kit (Invitrogen) by surface staining and with IL-10-PE (BD) by intracellular staining for 30min at 4°C. For BCR signalling assays: 0.5x10<sup>6</sup> non-activated or anti-IgM (20μg/ml)/anti-IgG (20μg/ml)-activated B-cell subsets were co-cultured with 0.5x10<sup>5</sup> CD40L-transfected or non-transfected L-cells for 3 days. IL-10-PE (BD) was detected by intracellular staining. Cells were acquired on an LSRFortessa (BD). Data was analysed using FlowJo (Tree Star, Inc. Ashland, OR 97520. USA).

### **IL-10 production by transitional B-cells from patients and healthy controls**

For IL-10 measurements in transitional B-cell subsets: 10x10<sup>4</sup> sorted transitional B-cells from 3 healthy controls and 3 tolerant recipients were activated with 1x10<sup>3</sup> non-transfected or CD40L-transfected L-cells, with or without BCR activation anti-IgM (20μg/ml)/anti-IgG (20μg/ml) for 3 days. IL-10 in the supernatants was measured using Cytometric Beads Array human Th1/Th2/Th17 kit (BD). For IL-10: the sensitivity of the

kit was 4.5 pg/mL and the standard curve range was from 4.5 to 5000 pg/mL. Beads were acquired on LSRFortessa (BD).

**Flow Cytometry settings were used to monitor staining panels in healthy volunteers and patients samples**

Flow cytometry panels in this study were monitored with CS&T (Cytometer Setup and Tracking, BD) beads, as a quality control for the Flow Cytometer; Application settings, as a quality control of the flow cytometry staining; and Inter and Intra-assay controls, as a quality control of the flow cytometry staining and the quality of the samples.

## Supplementary Figures



**Supplementary Figure 1: B-cell subsets flow cytometry gating strategy.** B-cells were identified as CD20<sup>+</sup>CD19<sup>+</sup> B-cells. Within the B-cell population, memory B-cells were identified as CD27<sup>+</sup> B-cells. IgM<sup>+</sup>IgD<sup>+</sup> cells were gated from the CD27<sup>-</sup> B-cell population and from the IgM<sup>+</sup>IgD<sup>+</sup> B-cells, naive B-cells were identified as CD24<sup>+</sup>CD38<sup>+</sup> cells and transitional B-cells were identified as CD24<sup>hi</sup>CD38<sup>hi</sup> cells. Representative dot-plots of total, memory, IgD<sup>+</sup>IgM<sup>+</sup>, naive and transitional B-cells were obtained from PBMCs from healthy controls (HC) and tolerant (Tol) patients by flow cytometry.



**Supplementary Figure 2: IL-10 production by isolated B-cell subsets after CD40L and CpG activation.** A) Sorted memory, naïve and transitional B-cells were obtained from healthy leukocytes retained in filtering cones.  $0.5 \times 10^6$  sorted B-cell subsets were activated with  $0.1 \times 10^5$  non-transfected L-cells or human-CD40L-transfected L-cells B) and with or without CpG ( $1 \mu\text{M}$ ) for 72hrs. ELISA and intracellular

staining were used to measure IL-10 and TNF- $\alpha$ . Two-way RM ANOVA test with a Sidak's multiple comparisons test was used. For all statistical tests \*\*\*\*  $P < 0.0001$ , \*\*\*  $P < 0.001$  and \*\*  $P < 0.01$  were considered significant.



**Supplementary Figure 3: IL-10 production by isolated B-cell subsets after CD40L, BCR and CD40/BCR activation.**

IL-10 production after CD40, BCR and CD40/BCR activation was measured by adding  $0.5 \times 10^5$  non-transfected or CD40L-transfected L-cells in  $0.5 \times 10^6$  non-activated or BCR-activated sorted memory, naïve and transitional B-cells obtained from healthy leukocytes retained filtering cones. B-cell subsets were activated for 72hrs and IL-10 was detected with intracellular staining.



**Supplementary Figure 4: ERK phosphorylation after BCR and CD40L activation.**

A) Phosphorylation of ERK was assessed by phospho-flow using non-activated samples as negative controls and PMA-activated samples as positive controls. Phosphorylation ERK after CD40L, BCR, or BCR/CD40 activation was measured by adding  $0.5 \times 10^5$  non-transfected or CD40L-transfected L-cells in  $0.5 \times 10^6$  non-activated or BCR-activated B-cells from healthy volunteers after 3 days of culture by phospho-flow. B) ERK phosphorylation between different activating conditions was compared. Ordinary one-way ANOVA with a Tukey's multiple comparisons test was used, \*\*\*\*  $P < 0.0001$ , \*\*\*  $P < 0.001$ , \*\*  $P < 0.01$  and \*  $P < 0.05$  were considered significant.



**Supplementary Figure 5: Schema of B-cell from tolerant recipients.**

B-cells from tolerant patients exhibit higher percentages of IL-10-producing B-cells after CD40 activation with limited evidence of concomitant pro-inflammatory cytokines in parallel and reduced BCR signalling all when compared to B-cells from healthy controls. Reduction in the BCR signalling favoured IL-10 production in the transitional B-cell population of tolerant recipients. In addition, reduced IL-2 and IL-4 production by T-cells, may contribute to the low IgG1 levels observed in the serum. *Schema based on data from this manuscript and Nova-Lamperti et al., 2016<sup>14</sup>.*

| <b>Tolerant</b> | <b>Cause of end-stage renal disease</b> |                                                                          |
|-----------------|-----------------------------------------|--------------------------------------------------------------------------|
| Tol 1           | Glomerular Disease                      | -Mesangial GN and Malignant Hypertension                                 |
| Tol 2           | Genetic Disorder                        | -Polycystic Kidney Disease                                               |
| Tol 3           | Other                                   | -Unknown, possibly B-cell lymphoproliferative disorder                   |
| Tol 4           | Other                                   | -Traumatic loss of Kidney after Road accident                            |
| Tol 5           | Other                                   | -Unknown                                                                 |
| Tol 6           | Diabetes                                | -Diabetes type 2. Biopsy proven Nephropathy. Patient has Marfan Syndrome |
| Tol 7           | Glomerular Disease                      | -Membranoproliferative GN Type 1                                         |
| Tol 8           | Pyelonephritis                          | -Pyelonephritis/Reflux Nephropathy                                       |
| Tol 10          | Glomerular Disease                      | -Membranous GN                                                           |
| Tol 11          | Pyelonephritis                          | -Unknown, possibly chronic pyelonephritis                                |
| Tol 12          | Genetic Disorder                        | -Congenital Renal Dysplasia                                              |
| Tol 13          | Glomerular Disease                      | -Membranoproliferative GN                                                |
| Tol 14          | Glomerular Disease                      | -Mesangial GN and Malignant Hypertension                                 |
| Tol 15          | Other                                   | -Drug Induced ESRF post-leukemia                                         |
| Tol 16          | Glomerular Disease                      | -GN                                                                      |

**Supplementary Table 1: Causes of Kidney failure or end-stage renal disease (ESRD) in tolerant kidney transplant recipients.**

Tol: Tolerant recipient. GN: Glomerulonephritis. ESRF: End-stage Renal Failure.
